# Supplementary material
Source: PubMed Central journal article supplement (PMC8172456)
Supplement: NIHMS1685506-supplement-1.pdf [file NIHMS1685506-supplement-1.pdf]

# Supplemental Figure 1

**A**

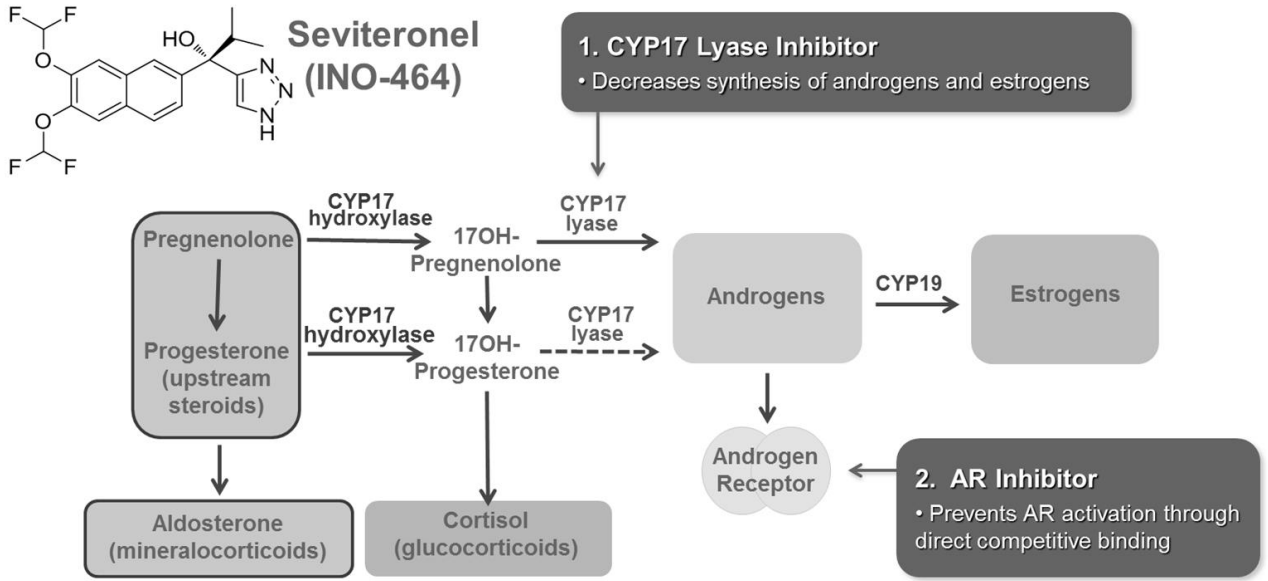

**Supplemental Figure 1. Sevi method of action. (A)** Schematic of the seviteronel (Sevi) mechanism of action.
