# Supplementary material
Source: PubMed Central journal article supplement (PMC8172456)
Supplement: NIHMS1685506-supplement-2.pdf [file NIHMS1685506-supplement-2.pdf]

# Supplemental Figure 2

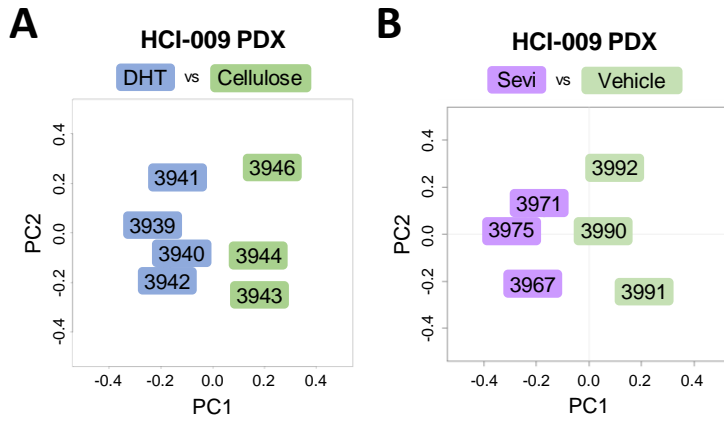

**Supplemental Figure 2. HCl-009 PDX experimental principal component analyses. (A-B)** RNAseq principal component analyses (PC) for HCl-009 PDX experiments. **(A)** HCl-009 PDX tumor portions were injected into the mammary fat pads of female NSG mice supplemented with cellulose or DHT (dihydrotestosterone); n=5-7 mice per group. **(B)** HCl-009 PDX tumor portions were injected into the mammary fat pads of female NSG mice. Mice were administered vehicle or 150mg/kg/day Sevi (seviteronel); n=4-5 mice per group.
