# Supplementary material
Source: PubMed Central journal article supplement (PMC8172456)
Supplement: NIHMS1685506-supplement-3.pdf [file NIHMS1685506-supplement-3.pdf]

# Supplemental Figure 3

**A**

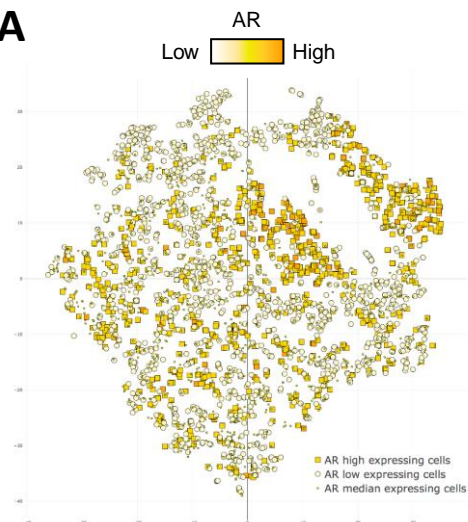

**B**

## Diseases and Function Pathways

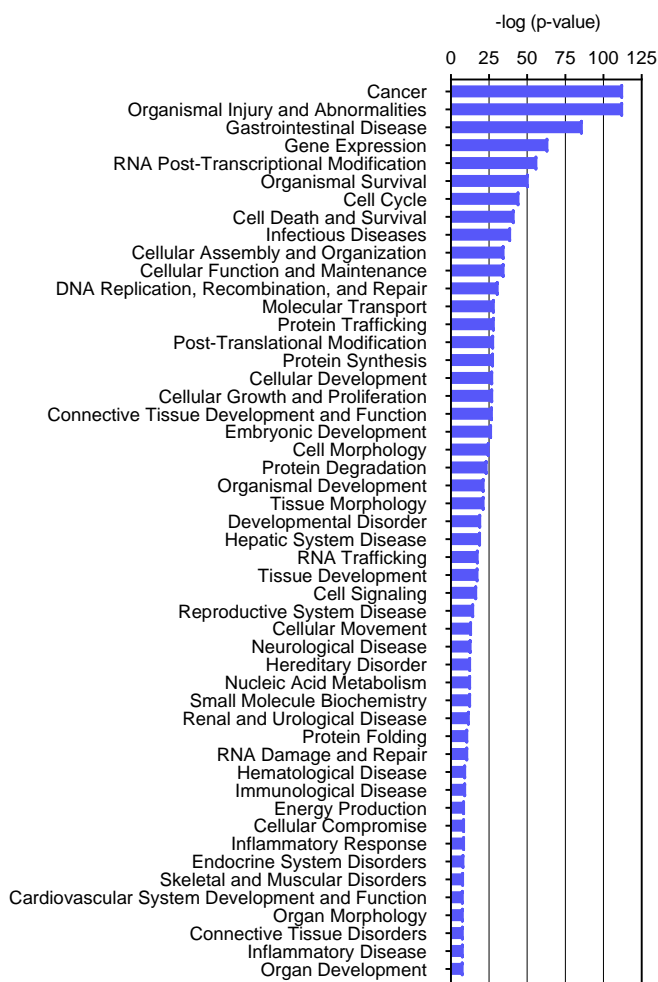

## Canonical Pathways

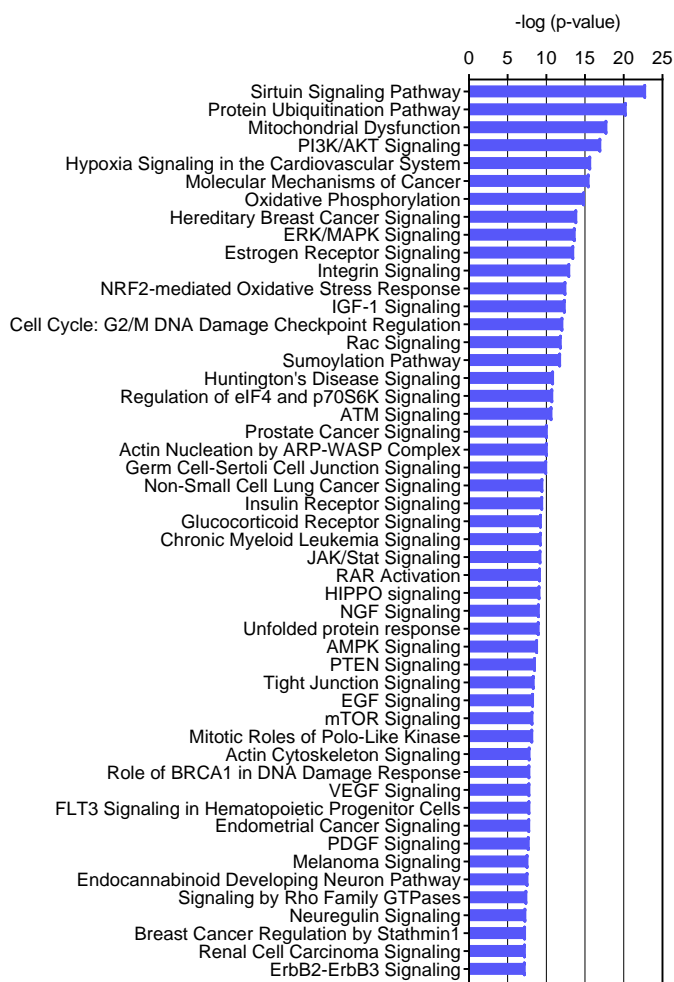

**Supplemental Figure 3. Single-cell RNAseq of AR expressing MDA-MB-453 TNBC cells.** scRNAseq was performed on untreated MDA-MB-453 cells cultured in full serum media. Cells were divided in groups based on their expression of AR, AR<sup>Low</sup> and AR<sup>High</sup>. **(A)** tSNE plot of AR levels in cells clustered by gene expression. **(B)** IPA was performed on the genes differentially expressed between AR<sup>Low</sup> and AR<sup>High</sup> groups. Shown are the top 50 most significantly altered disease and function pathways and canonical pathways.
