# Supplementary material
Source: PubMed Central journal article supplement (PMC8172456)
Supplement: NIHMS1685506-supplement-4.pdf [file NIHMS1685506-supplement-4.pdf]

# Supplemental Figure 4

**A**

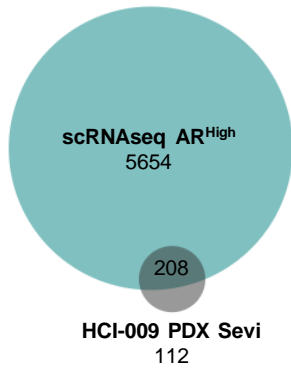

**B**

## MDA-MB-453 AR<sup>High</sup> vs HCl-009 PDX Sevi Pathways Enriched in Overlapping Gene Sets

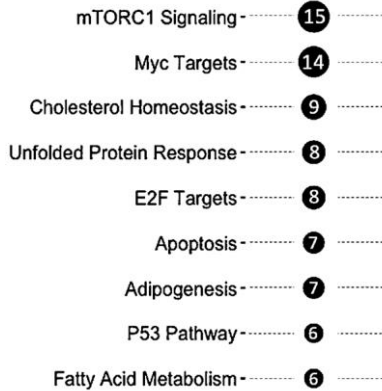

**Supplemental Figure 4. Overlap between RNAseq datasets from MDA-MB-453 AR<sup>High</sup> cells and HCl-009 PDX mice treated with Sevi.** scRNAseq was performed on untreated MDA-MB-453 cells cultured in full serum media. Cells were divided in groups based on their expression of AR, AR<sup>Low</sup> and AR<sup>High</sup>. RNAseq was performed on HCl-009 PDX tumor from mice treated daily with vehicle or 150mg/kg/day Sevi. **(A)** Venn diagram of overlap between gene signatures. **(B)** Biological pathways identified by examining the list of 208 genes that overlap between datasets. Numbers per pathway represent the number of genes associated with each pathway.
