# Supplementary material
Source: PubMed Central journal article supplement (PMC8172456)
Supplement: NIHMS1685506-supplement-5.pdf [file NIHMS1685506-supplement-5.pdf]

# Supplemental Figure 5

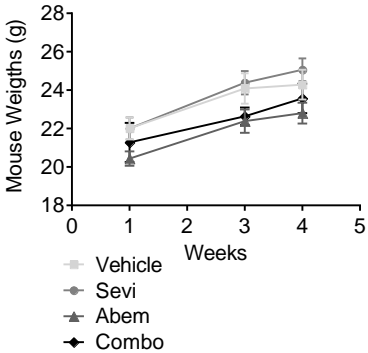

**Supplemental Figure 5. Tolerability of combination therapy.** MDA-MB-453 cells were injected into the mammary fat pads of cycling female nu/nu mice; n=6-7 mice per group. Sevi and/or Abem were administered daily. Mouse weights were measured throughout the experiment. Mean  $\pm$  standard error of the mean.
